# Supplementary material for: An automated DNA computing platform for rapid etiological diagnostics
Source: PubMed Central journal article supplement — Sci Adv. 2022 Nov 25;8(47):eade0453. doi: 10.1126/sciadv.ade0453 (PMC9699674; doi:10.1126/sciadv.ade0453), 2022-11-25
Supplement: sciadv.ade0453_sm.pdf [file sciadv.ade0453_sm.pdf]

Supplementary Materials for  
**An automated DNA computing platform for rapid etiological diagnostics**

Qian Ma *et al.*

Corresponding author: Da Han, dahan@sjtu.edu.cn; Weihong Tan, tan@hnu.edu.cn;  
Chao Zhang, chaozhang@sjtu.edu.cn

*Sci. Adv.* **8**, eade0453 (2022)  
DOI: 10.1126/sciadv.ade0453

**This PDF file includes:**

Figs. S1 to S15  
Tables S1 to S6

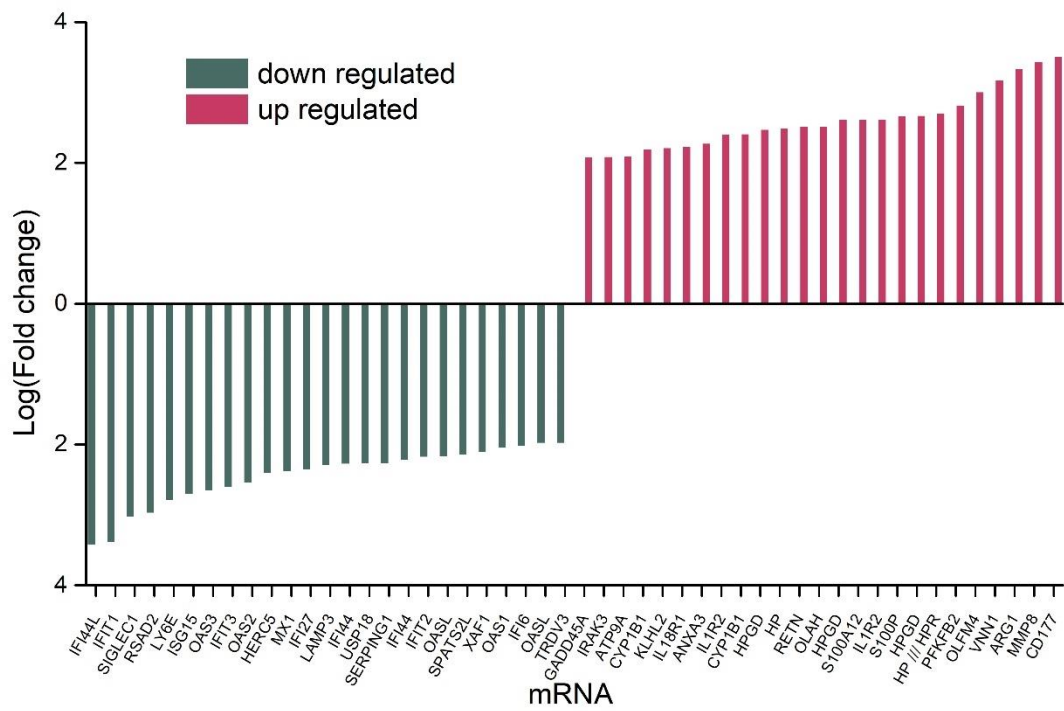

**Fig. S1. Expression fold changes of mRNAs in the bacterial infection samples compared to those of viral infection samples.** The original data were obtained from the NCBI GSE63990 database.

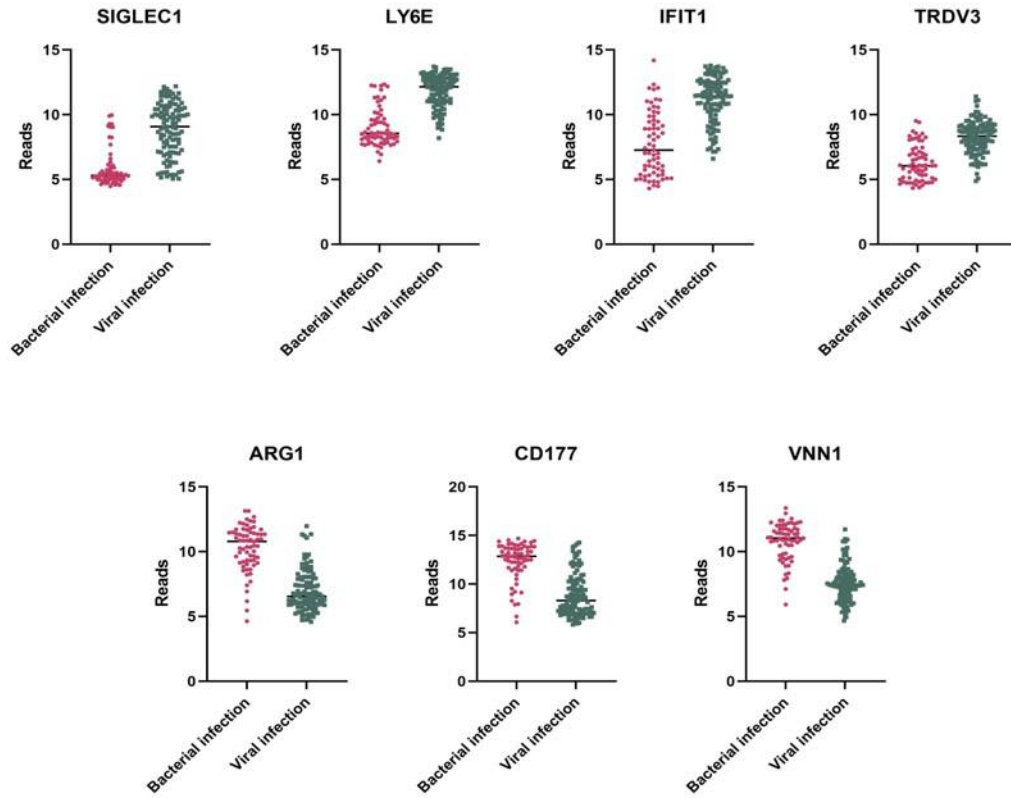

**Fig. S2. Expression levels of seven selected mRNAs between bacterial and viral infection samples** (values from the mRNA-seq reads in the GEO database). Horizontal lines indicate median values of the groups.

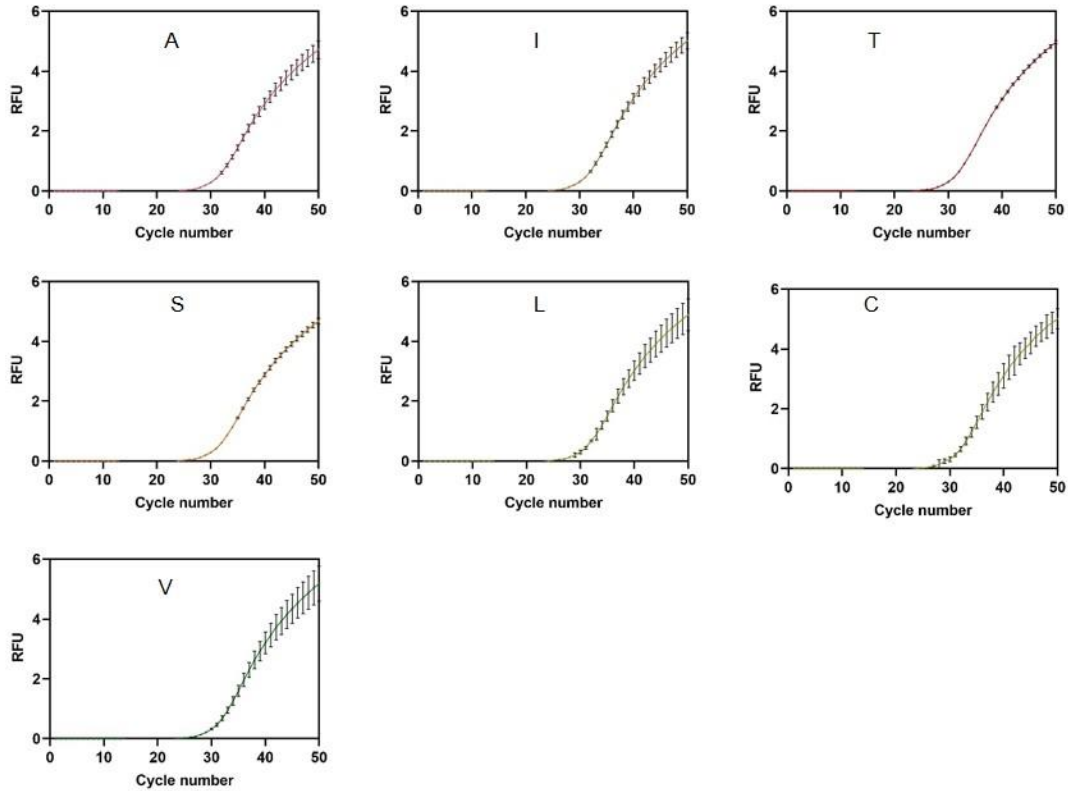

**Fig. S3. LATE-PCR amplification efficiency for the seven selected mRNAs post-transcription.** Labels of PCR traces were simplified by using the first letter of corresponding mRNA candidates. 1.0 pM of each synthetic cDNA was spiked to seven separate PCR tubes and incubated with the corresponding primers, enzymes and reporting probes (TaqMan) for LATE-PCR (LATE-PCR for 50 cycle; see detailed information in Table S5). Data are presented as the mean  $\pm$  s.d.;  $n = 3$  independent experiments.

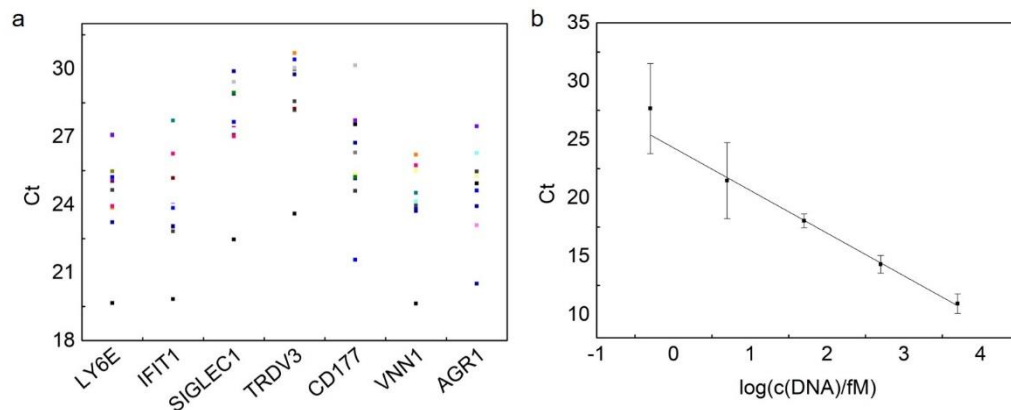

**Fig. S4. Quantitation of target mRNAs in clinical samples. a.** CT values of target mRNAs by q-PCR quantitation in 10 randomly selected blood samples with ARIs caused by bacteria (5 samples) and virus (5 samples). **b.** The calibration curve ( $R^2=0.99$ ) between CT values with the concentration of cDNA by q-PCR (see Table S5). This result indicates that the concentrations of mRNAs are variable, but always below 50 fM in the clinical samples.

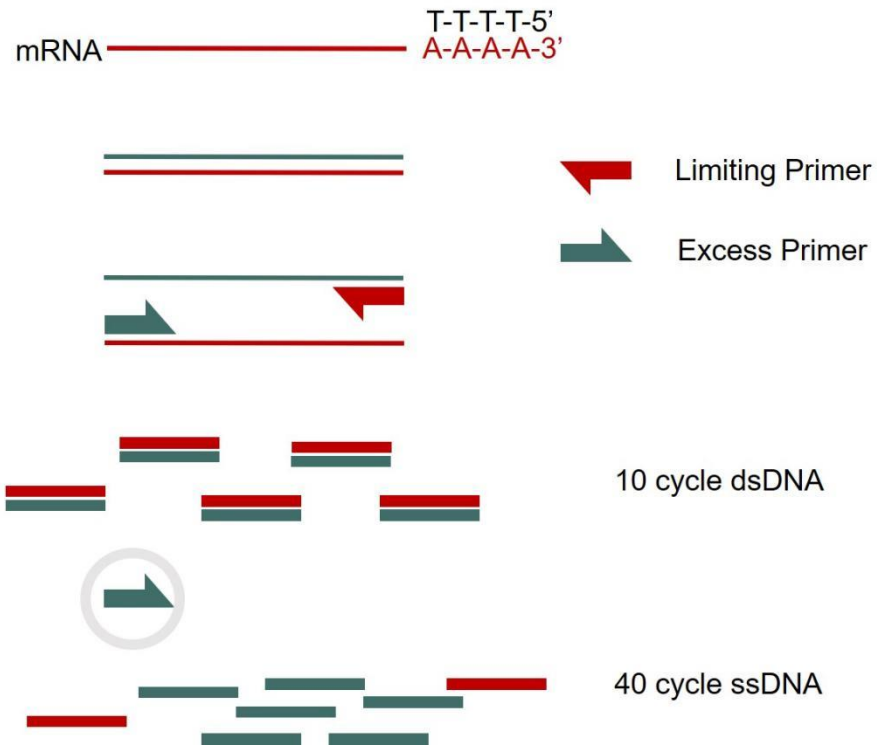

**Fig. S5. Scheme of reverse transcription and linear-after-the-exponential (LATE-PCR) processes.**

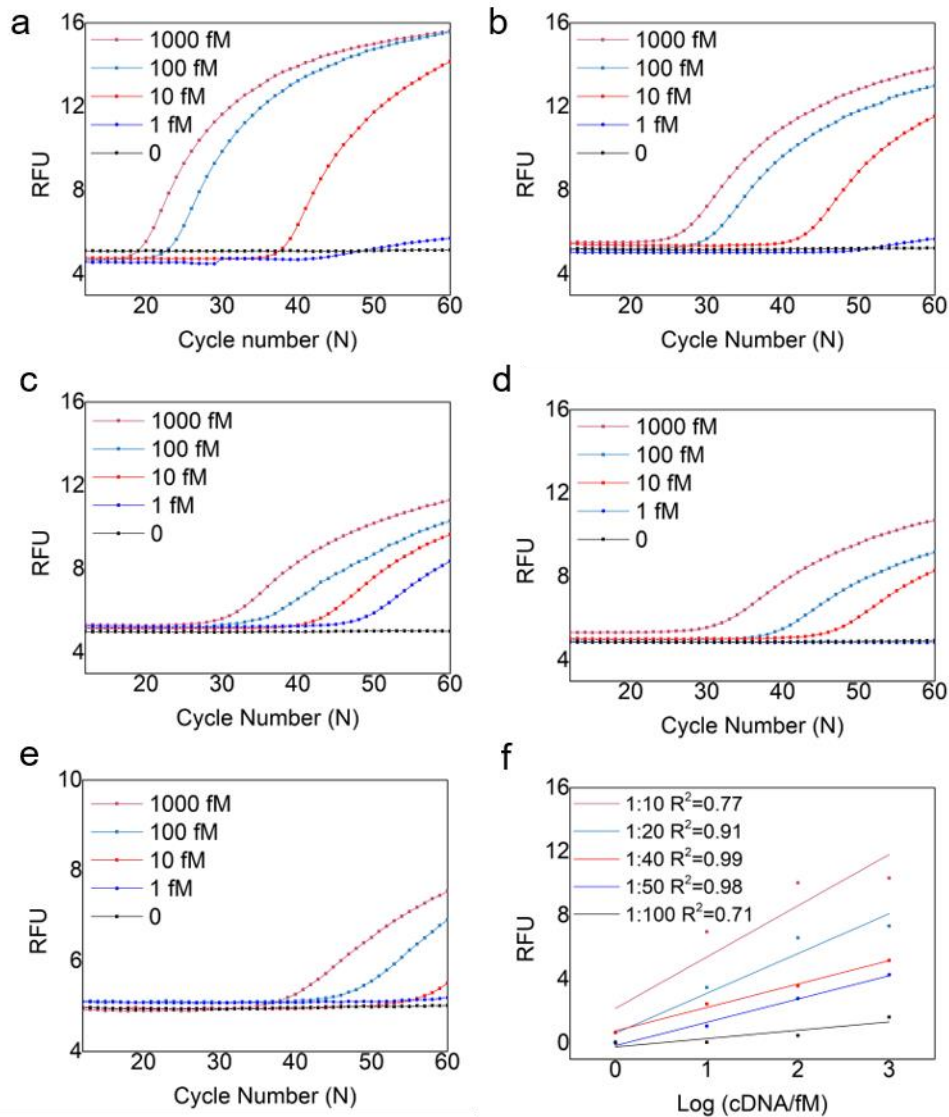

**Fig. S6. Optimization of forward (F) and reverse primer (R) ratios (a. F: R=1:10; b. F: R=1:20; c. F: R=1:40; d. F: R=1:50; e. F: R=1:100) in LATE-PCR.** The concentrations of ssDNA products were analyzed by TaqMan reporting probes. **f.** Plot of logarithmic initial concentrations of mRNA templates vs. fluorescence readings of LATE-PCR at cycle = 50. Taking together the final product amounts and linearity, we selected F: R=1:40 as the optimum conditions for amplification.

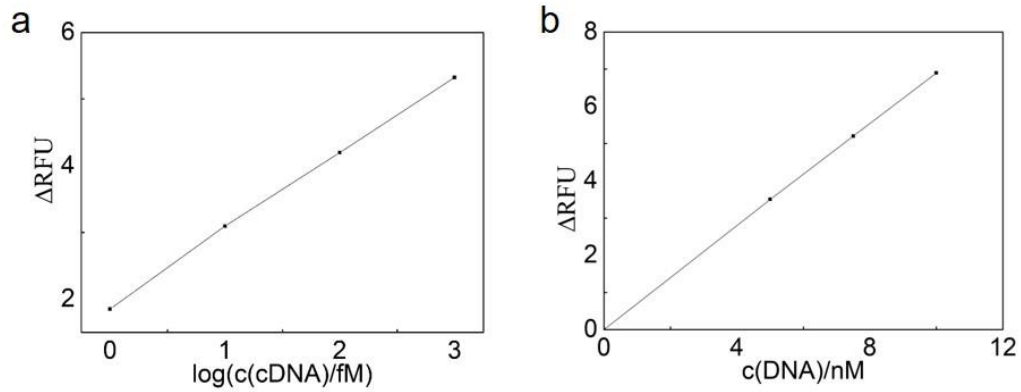

**Fig. S7. Quantification of final product post-LATE-PCR. a.** cDNA amplicon of SIGLEC1 after LATE-PCR (50 cycle) *vs.* fluorescence change ( $\Delta$ RFU, quantified by using duplex A reporter) were quantified by duplex A reporter (see Table S5). **b.** Synthetic DNA with known concentrations *vs.* fluorescence change ( $\Delta$ RFU, quantified by using duplex A reporter). Results showed that cDNA inputs from 0-1000 fM can be amplified to higher concentrations of ssDNA ( $\geq 1$  nM) by LATE-PCR.



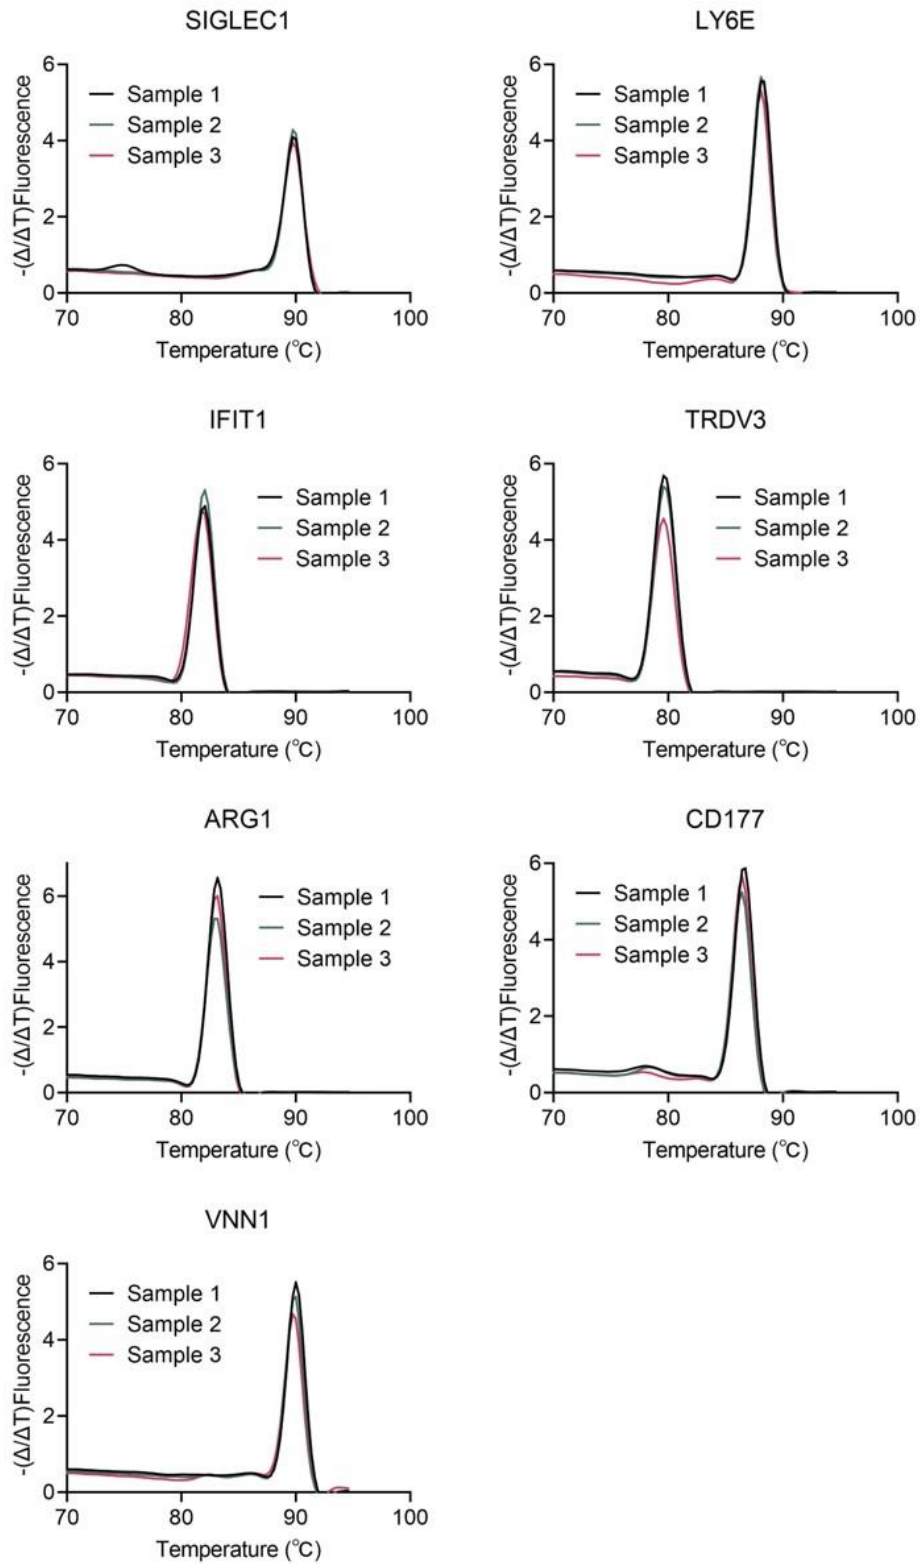

**Fig. S8. Verification of primer specificity by q-PCR in three clinical blood samples** (qPCR for 40 cycle; see Table S5). Peaks in the melting curve indicate the melting temperature ( $T_m$ ) of target mRNA.

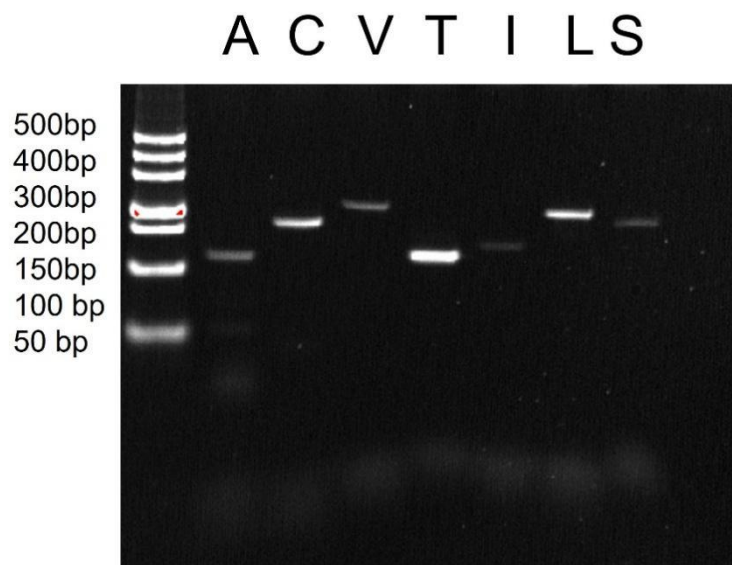

**Fig. S9.** Polyacrylamide gel electrophoresis results obtained from q-PCR with the designed primer pairs (see Table S5). (A: ARG1, C: CD177, V: VNN1, T: TRDV3, I: IFIT1, L: LY6E, S: SLGLEC1).

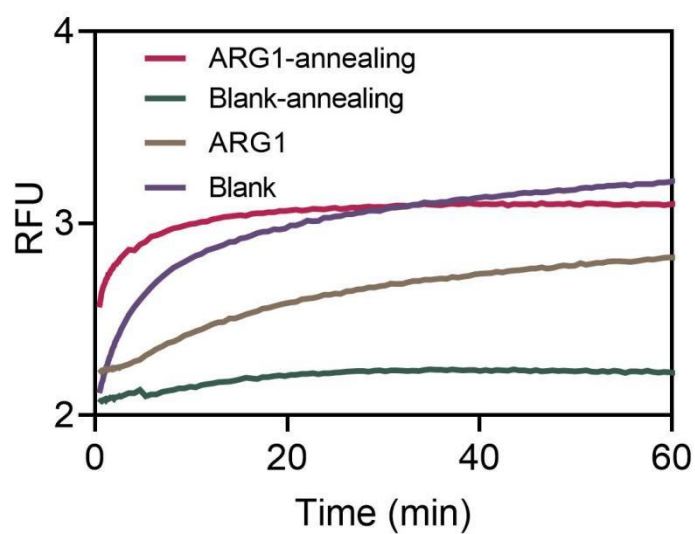

**Fig. S10. Effect of thermal annealing to improve reporting efficiency of mRNA with intensive secondary structures post-reverse transcription.** Thermal annealing was performed by heating the reactants (10 nM ARG1 cDNA) to 70°C for 10 s and then cooling them to 25°C at a rate of -1°C/10 s together with A reporter.

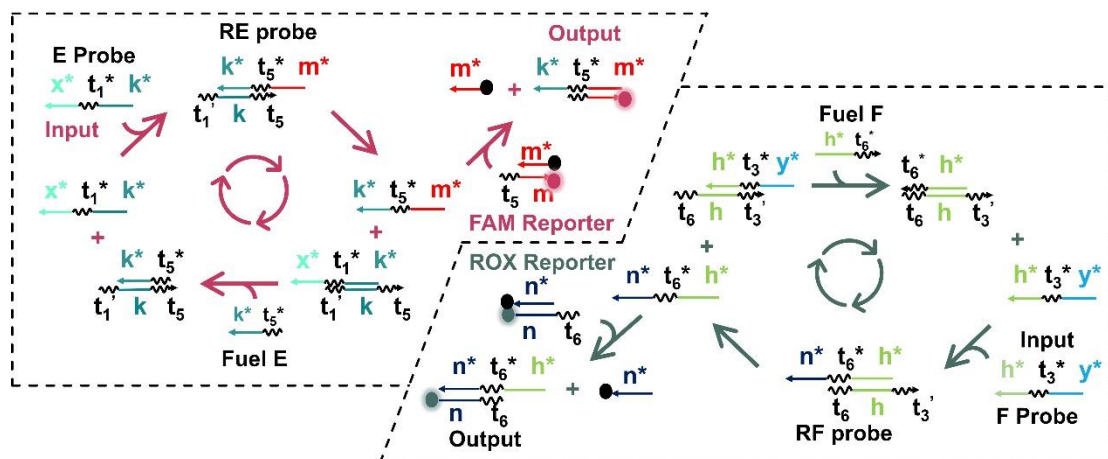

**Fig. S11. Scheme of the amplification step for sensitivity improvement.** (Two distinct fluorescent reporters with FAM and ROX fluorophores were used to report the corresponding outputs associated with positive and negative weights after the subtraction operation. A catalytic entropy-driven amplification restores the offset signals and improves the reporting sensitivity.)

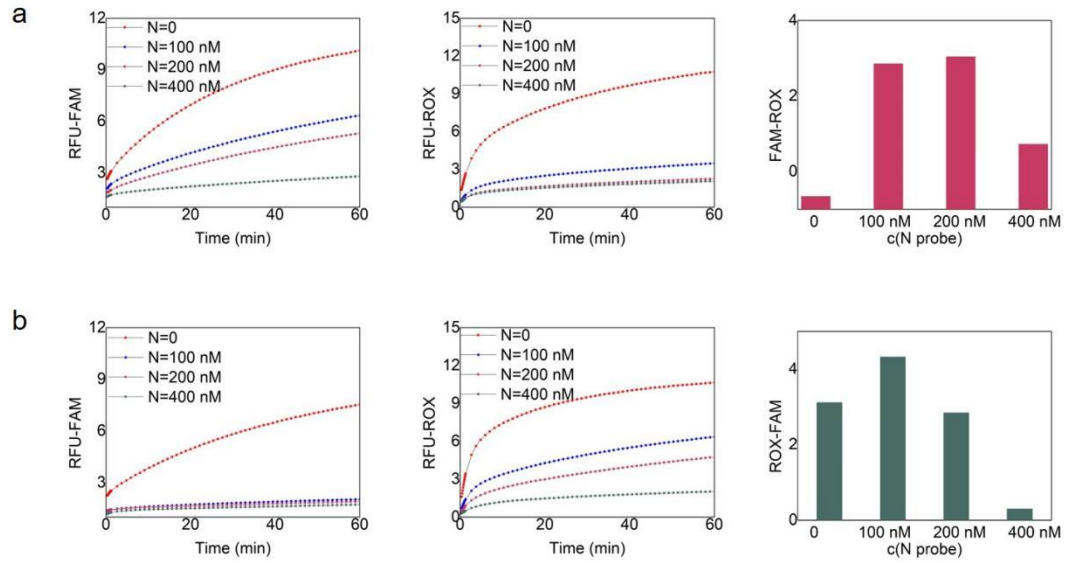

**Fig. S12. Optimization of N probe concentrations for more sensitive reporting in the subtraction step. a.**  $c$  (E probe) =30 nN;  $c$  (F probe) =20 nM; **b.**  $c$  (E probe) =20 nN,  $c$  (F probe) =30 nM. (Restoration probe E/F:100 nM; Fuel E/F: 200 nM; FAM/ROX reporter 200 nM).

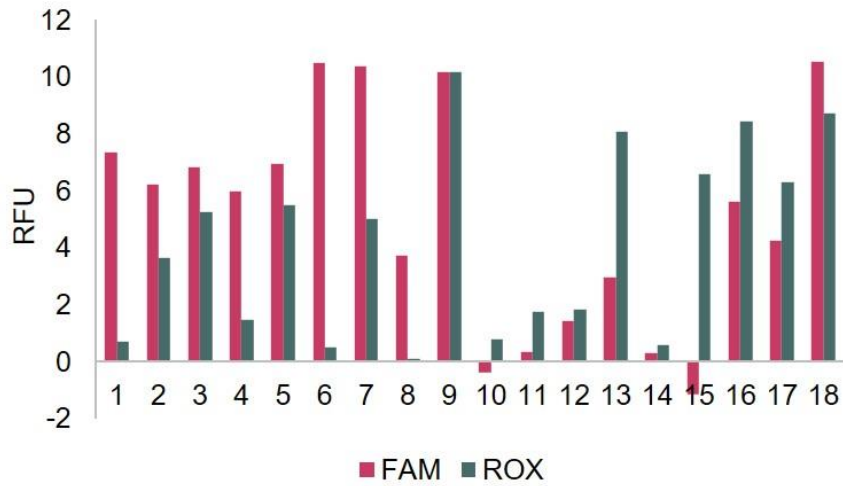

**Fig. S13. Fluorescence readings of 18 synthetic samples.** (Bacterial infection samples: No. 1-9; Viral infection samples: No. 10-18).  $(RFU(FAM)) - (RFU(ROX)) > 0$  is considered bacterial infection, whereas  $(RFU(FAM)) - (RFU(ROX)) < 0$  is considered viral infection.

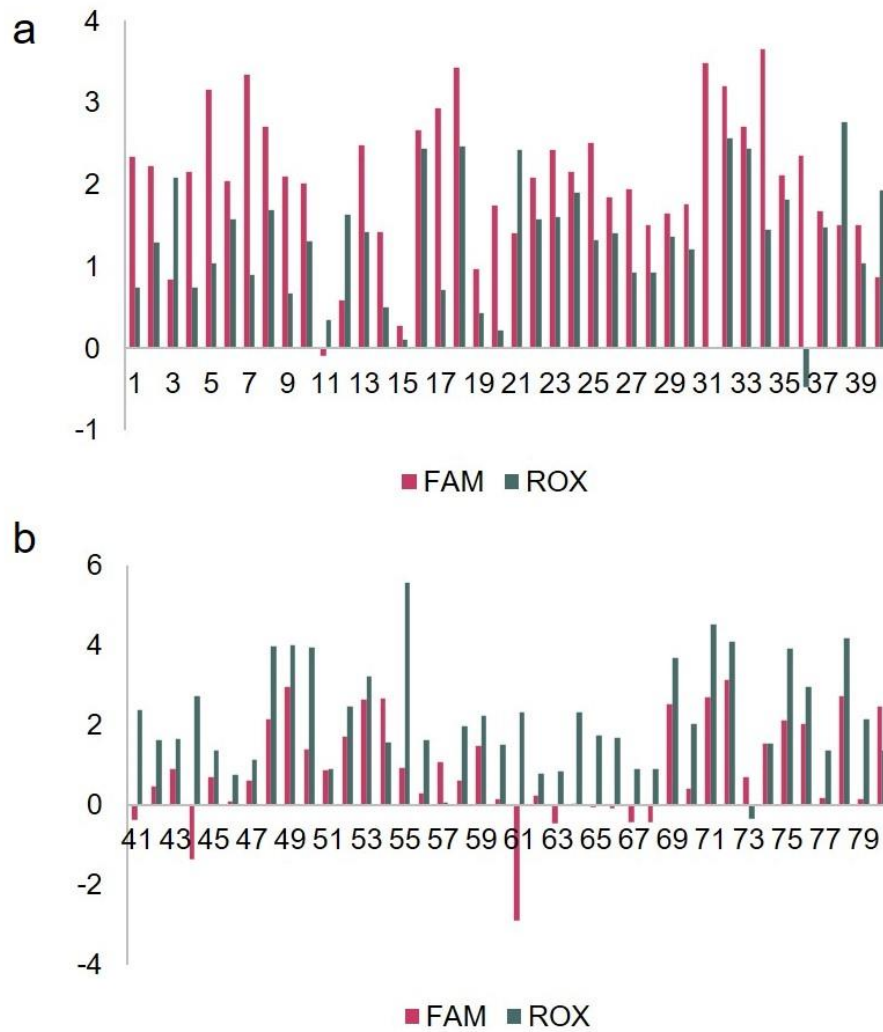

**Fig. S14. Fluorescence readings of 80 clinical blood samples.** **a.** Fluorescence readings of bacterial infection samples (No. 1-40) from both FAM and ROX reporting. **b.** Fluorescence readings of viral infection samples (No. 41-80) from both FAM and ROX reporting.  $(RFU(FAM)) - (RFU(ROX)) > 0$  is considered bacterial infection, whereas  $(RFU(FAM)) - (RFU(ROX)) < 0$  is considered viral infection.





**Table S1.** Sensitivity, specificity, and the area under the ROC curve (AUC) of single mRNA and the panel (7 mRNA with trained model) for the etiological diagnosis of ARI.

|                | <b>Sensitivity</b> | <b>Specificity</b> | <b>AUC</b> |
|----------------|--------------------|--------------------|------------|
| <b>Panel</b>   | 89.6               | 91.2               | 94.2       |
| <b>ARG1</b>    | 88.1               | 85.0               | 90.6       |
| <b>CD177</b>   | 82.1               | 84.1               | 86.8       |
| <b>IFIT1</b>   | 82.1               | 75.2               | 86.0       |
| <b>TRDV3</b>   | 74.6               | 83.2               | 85.1       |
| <b>LY6E</b>    | 72.1               | 92.9               | 91.0       |
| <b>SIGLEC1</b> | 80.6               | 86.7               | 88.9       |
| <b>VNN1</b>    | 91.0               | 84.1               | 92.8       |

**Table S2.** Concentrations of 7 cDNAs in the synthetic samples (1: 1.0 pM; 0: 0 pM)

| Sample | SIGLEC1 | LY6E | IFIT1 | TRDV3 | VNN1 | CD177 | ARG1 |
|--------|---------|------|-------|-------|------|-------|------|
| 1      | 1       | 0    | 0     | 0     | 1    | 1     | 1    |
| 2      | 1       | 1    | 0     | 0     | 1    | 1     | 1    |
| 3      | 1       | 1    | 0     | 1     | 1    | 1     | 1    |
| 4      | 1       | 0    | 1     | 0     | 1    | 1     | 0    |
| 5      | 1       | 0    | 0     | 0     | 1    | 0     | 1    |
| 6      | 0       | 0    | 0     | 0     | 1    | 1     | 1    |
| 7      | 1       | 0    | 1     | 0     | 1    | 1     | 1    |
| 8      | 0       | 1    | 0     | 1     | 1    | 1     | 1    |
| 9      | 1       | 1    | 1     | 0     | 1    | 1     | 1    |
| 10     | 1       | 1    | 1     | 1     | 1    | 0     | 0    |
| 11     | 1       | 1    | 1     | 1     | 0    | 1     | 0    |
| 12     | 1       | 1    | 1     | 0     | 0    | 1     | 1    |
| 13     | 1       | 1    | 0     | 0     | 1    | 0     | 0    |
| 14     | 1       | 1    | 0     | 0     | 0    | 1     | 0    |
| 15     | 1       | 1    | 1     | 1     | 0    | 0     | 0    |
| 16     | 1       | 1    | 1     | 1     | 1    | 0     | 1    |
| 17     | 1       | 1    | 1     | 1     | 0    | 1     | 1    |
| 18     | 1       | 1    | 1     | 1     | 1    | 1     | 0    |

**Table S3.** Clinical sample related information.

| <b>Sample No.</b> | <b>Pathogen detected</b>                  | <b>NEU%</b> | <b>LYM%</b> | <b>MON%</b> | <b>CRP</b> |
|-------------------|-------------------------------------------|-------------|-------------|-------------|------------|
| 1                 | Parainfluenza 1,2,3                       | 85.60       | 7.30        | 6.20        | 0.640      |
| 2                 | Influenza B virus                         | 76.90       | 14.30       | 8.50        | 17.420     |
| 3                 | Parainfluenza 1,2,3                       | 54.20       | 35.30       | 7.50        | 35.130     |
| 4                 | Influenza B virus;<br>Parainfluenza 1,2,3 | 68.00       | 23.50       | 8.10        | 0.830      |
| 5                 | Parainfluenza 1,2,3                       | 68.90       | 21.10       | 7.60        | 7.480      |
| 6                 | Epstein-Barr virus                        | 80.10       | 13.50       | 5.60        | 0.840      |
| 7                 | Influenza B virus;<br>Parainfluenza       | 62.30       | 28.50       | 6.20        | 11.050     |
| 8                 | Influenza B virus                         | 57.90       | 30.20       | 10.50       | 0.920      |
| 9                 | Influenza B virus                         | 44.30       | 44.60       | 7.30        | 0.960      |
| 10                | Influenza B virus                         | 55.10       | 36.10       | 6.40        | 1.210      |
| 11                | Influenza B virus                         | 70.90       | 20.90       | 6.40        | 1.430      |
| 12                | Influenza B virus                         | 65.00       | 24.80       | 5.80        | 1.500      |
| 13                | Influenza B virus                         | 75.00       | 21.00       | 3.50        | 0.850      |
| 14                | Parainfluenza 1,2,3                       | 66.20       | 26.40       | 6.20        | 0.840      |
| 15                | Influenza B virus                         | 59.70       | 30.60       | 8.40        | 94.470     |
| 16                | Parainfluenza 1,2,3                       | 68.20       | 15.60       | 15.80       | 0.850      |
| 17                | Influenza B virus                         | 67.60       | 23.60       | 6.80        | 0.940      |
| 18                | Parainfluenza virus                       | 68.50       | 26.10       | 4.60        | 0.670      |
| 19                | Parainfluenza virus                       | 43.50       | 47.80       | 5.90        | 3.520      |
| 20                | Parainfluenza virus                       | 66.80       | 28.10       | 4.30        | 15.430     |
| 21                | Parainfluenza virus                       | 61.70       | 29.50       | 6.40        | 19.170     |
| 22                | Parainfluenza virus                       | 81.80       | 11.30       | 5.90        | 1.430      |

|    |                                                                   |       |       |      |        |
|----|-------------------------------------------------------------------|-------|-------|------|--------|
| 23 | Parainfluenza virus                                               | 58.40 | 35.70 | 5.10 | 2.570  |
| 24 | Parainfluenza virus                                               | 81.80 | 10.60 | 7.50 | 0.870  |
| 25 | Parainfluenza virus                                               | 56.40 | 36.40 | 5.30 | 0.880  |
| 26 | Parainfluenza virus                                               | 80.80 | 8.40  | 9.50 | 1.240  |
| 27 | Parainfluenza virus                                               | 50.50 | 43.00 | 5.50 | 1.300  |
| 28 | Parainfluenza virus                                               | 64.40 | 28.50 | 6.20 | 1.210  |
| 29 | Parainfluenza virus                                               | 65.10 | 25.30 | 8.30 | 1.540  |
| 30 | Parainfluenza virus                                               | 61.50 | 25.20 | 9.60 | 0.660  |
| 31 | Influenza B virus                                                 | 54.40 | 37.20 | 6.10 | 9.080  |
| 32 | Influenza B virus                                                 | 60.30 | 33.40 | 5.20 | 1.510  |
| 33 | Parainfluenza virus                                               | 70.10 | 23.20 | 5.00 | 6.380  |
| 34 | Parainfluenza virus                                               | 55.80 | 33.40 | 7.10 | 1.510  |
| 35 | Parainfluenza virus                                               | 54.00 | 32.80 | 5.60 | 67.780 |
| 36 | Parainfluenza virus                                               | 63    | 14    | 8    | 7.390  |
| 37 | Parainfluenza virus                                               | 59.10 | 29.10 | 6.70 | 8.120  |
| 38 | Influenza B virus                                                 | 61.20 | 31.40 | 6.20 | 0.670  |
| 39 | Influenza B virus                                                 | 64.00 | 23.30 | 9.50 | 0.700  |
| 40 | Influenza B virus                                                 | 74.10 | 17.90 | 6.90 | 0.830  |
| 41 | Legionella pneumophila serotype I -IgM                            | 59.90 | 31.00 | 7.10 | 4.110  |
| 42 | Mycoplasma pneumoniae IgM                                         | 75.70 | 15.50 | 6.90 | 0.550  |
| 43 | Legionella pneumophila serotype I -IgM                            | 64.60 | 28.40 | 6.20 | 9.860  |
| 44 | Legionella pneumophila serotype I -IgM; Mycoplasma pneumoniae IgM | 57.10 | 32.10 | 6.80 | 5.900  |

|    |                                                                                |       |       |       |        |
|----|--------------------------------------------------------------------------------|-------|-------|-------|--------|
| 45 | Legionella pneumophila serotype I IgM                                          | 72.80 | 13.60 | 13.00 | 4.970  |
| 46 | Mycoplasma pneumoniae;<br>Gram-negative coccus (+);<br>Gram-positive cocci (+) | 80.70 | 12.40 | 5.20  | 24.570 |
| 47 | Legionella pneumophila;<br>Mycoplasma pneumoniae                               | 65.1  | 21.70 | 7.50  | 3.310  |
| 48 | Legionella pneumophila                                                         | 80.60 | 13.10 | 5.60  | 32.250 |
| 49 | Legionella pneumophila                                                         | 85.10 | 7.70  | 7.00  | 51.320 |
| 50 | Mycoplasma pneumoniae                                                          | 70.30 | 21.70 | 6.90  | 6.990  |
| 51 | Legionella pneumophila                                                         | 66.50 | 26.60 | 5.10  | 8.870  |
| 52 | Legionella pneumophila                                                         | 67.40 | 21.70 | 8.00  | 9.550  |
| 53 | Mycoplasma pneumoniae                                                          | 76.50 | 9.00  | 13.30 | 19.780 |
| 54 | Legionella pneumophila                                                         | 65.40 | 25.00 | 9.10  | 15.300 |
| 55 | Mycoplasma pneumoniae                                                          | 69.80 | 22.00 | 6.80  | 28.910 |
| 56 | Mycoplasma pneumoniae;<br>Legionella pneumophila                               | 86.20 | 9.30  | 4.40  | 0.920  |
| 57 | Mycoplasma pneumoniae                                                          | 71.60 | 19.80 | 7.30  | 38.840 |
| 58 | Mycoplasma pneumoniae                                                          | 53.60 | 34.20 | 7.40  | 0.950  |
| 59 | Mycoplasma pneumoniae                                                          | 40.80 | 38.70 | 13.80 | 3.450  |
| 60 | Mycoplasma pneumoniae                                                          | 63.60 | 28.70 | 5.70  | 32.250 |
| 61 | Mycoplasma pneumoniae                                                          | 70.90 | 22.40 | 5.20  | 1.420  |
| 62 | Mycoplasma pneumoniae                                                          | 59.40 | 30.50 | 8.10  | 8.870  |
| 63 | Legionella pneumophila                                                         | 64.20 | 27.60 | 6.40  | 2.140  |
| 64 | Legionella pneumophila                                                         | 59.20 | 34.60 | 4.60  | 2.560  |
| 65 | Mycoplasma pneumoniae                                                          | 74.30 | 20.10 | 4.30  | 13.860 |
| 66 | Mycoplasma pneumoniae                                                          | 81.00 | 10.10 | 8.50  | 51.320 |
| 67 | Mycoplasma pneumoniae                                                          | 75.10 | 16.20 | 7.80  | 96.500 |

|    |                        |       |       |       |        |
|----|------------------------|-------|-------|-------|--------|
| 68 | Mycoplasma pneumoniae  | 59.20 | 32.80 | 6.80  | 15.430 |
| 69 | Mycoplasma pneumoniae  | 90.50 | 4.00  | 3.80  | 1.710  |
| 70 | Legionella pneumophila | 65.80 | 26.40 | 5.90  | 17.420 |
| 71 | Legionella pneumophila | 72.80 | 20.80 | 4.60  | 3.190  |
| 72 | Legionella pneumophila | 60.60 | 30.10 | 6.80  | 3.960  |
| 73 | Legionella pneumophila | 52.70 | 35.70 | 10.20 | 38.840 |
| 74 | Legionella pneumophila | 68.80 | 21.10 | 9.00  | 4.970  |
| 75 | Legionella pneumophila | 73.30 | 18.20 | 6.10  | 3.190  |
| 76 | Legionella pneumophila | 53.90 | 32.20 | 8.50  | 96.500 |
| 77 | Legionella pneumophila | 67.30 | 21.30 | 9.30  | 2.520  |
| 78 | Legionella pneumophila | 83.70 | 10.70 | 4.70  | 0.700  |
| 79 | Legionella pneumophila | 70.60 | 18.50 | 9.10  | 21.000 |
| 80 | Legionella pneumophila | 75.60 | 15.60 | 6.20  | 4.700  |

**Table S4.** Comparison between DNA computational method and existing methods for ARI diagnosis

| <b>Diagnostic Method</b> | <b>Diagnostic Accuracy</b> | <b>Result analysis requirements</b> | <b>Time required for diagnosis</b> | <b>Instrumentation requirements</b> | <b>Cost</b> |
|--------------------------|----------------------------|-------------------------------------|------------------------------------|-------------------------------------|-------------|
| Blood routine            | <65%                       | Manual and Automated                | 1 hour                             | Minimal                             | \$          |
| CRP/PCT                  | <75%                       | Manual and Automated                | 6 hours                            | Minimal                             | \$\$        |
| q-PCR                    | ~85%                       | Manual                              | 6-12 hours                         | Minimal                             | \$\$        |
| Sequencing               | >90%                       | Manual and Automated                | 1 day                              | High                                | \$\$\$      |
| DNA microarray           | 88%                        | Manual and Automated                | 12 hours                           | High                                | \$\$\$      |
| Our platform             | 86%                        | Automated                           | 4 hours                            | Minimal                             | \$\$        |

**Table S5.** Detailed reaction conditions used in this paper

| <b>RNA extraction</b>                                                                                                                                                                                                                                                                                                                                                                                         |                                                                  |                             |
|---------------------------------------------------------------------------------------------------------------------------------------------------------------------------------------------------------------------------------------------------------------------------------------------------------------------------------------------------------------------------------------------------------------|------------------------------------------------------------------|-----------------------------|
| Total RNA was extracted from human blood using the Qiagen PAXgene Blood RNA Kit according to the manufacturer's protocol. Specifically, a lysis reagent is added to each blood sample first. Then the lysate is separated by adding chloroform and centrifugation. The sample is then applied to a spin column where the total RNAs, including mRNAs, can be eluted in a small volume of nuclease-free water. |                                                                  |                             |
| <b>RT-qPCR quantification</b>                                                                                                                                                                                                                                                                                                                                                                                 |                                                                  |                             |
| Total RNA was extracted from each blood sample with Qiagen Research kits. The isolated RNA was first reversely transcribed to cDNA using procedures described below. Then, the acquired cDNAs were amplified by using the qPCR Mix (Takara) according to the procedures in the instructions.                                                                                                                  |                                                                  |                             |
| components & concentrations                                                                                                                                                                                                                                                                                                                                                                                   | Components                                                       | Concentrations (20 $\mu$ L) |
|                                                                                                                                                                                                                                                                                                                                                                                                               | 2 $\times$ PCR Master Mix                                        | 10 $\mu$ L                  |
|                                                                                                                                                                                                                                                                                                                                                                                                               | Forward Primer                                                   | 0.25 $\mu$ M                |
|                                                                                                                                                                                                                                                                                                                                                                                                               | Reverse Primer                                                   | 0.25 $\mu$ M                |
|                                                                                                                                                                                                                                                                                                                                                                                                               | cDNA                                                             | 2 $\mu$ L                   |
|                                                                                                                                                                                                                                                                                                                                                                                                               | RNase-free water                                                 | Up to 20 $\mu$ L            |
| Protocol                                                                                                                                                                                                                                                                                                                                                                                                      | 95°C 5 min $\rightarrow$<br>40 cycles of 95°C 5 sec, 55°C 30 sec |                             |
| <b>Reverse transcription</b>                                                                                                                                                                                                                                                                                                                                                                                  |                                                                  |                             |
| We used a reverse transcription kit (Takara) to convert RNAs into cDNAs under the conditions and protocol shown in the table below:                                                                                                                                                                                                                                                                           |                                                                  |                             |
| components & concentrations                                                                                                                                                                                                                                                                                                                                                                                   | Components                                                       | Concentrations (10 $\mu$ L) |
|                                                                                                                                                                                                                                                                                                                                                                                                               | 5 $\times$ gDNA Eraser Buffer                                    | 2.0 $\mu$ L                 |
|                                                                                                                                                                                                                                                                                                                                                                                                               | gDNA Eraser                                                      | 1.0 $\mu$ L                 |
|                                                                                                                                                                                                                                                                                                                                                                                                               | Total RNA                                                        | 100 ng                      |
|                                                                                                                                                                                                                                                                                                                                                                                                               | RNase Free dH <sub>2</sub> O                                     | Up to 10 $\mu$ L            |
| Protocol                                                                                                                                                                                                                                                                                                                                                                                                      | 42°C for 2 min $\rightarrow$ 4°C                                 |                             |
|                                                                                                                                                                                                                                                                                                                                                                                                               | PrimeScript RT Enzyme Mix I                                      | 1.0 $\mu$ L                 |
|                                                                                                                                                                                                                                                                                                                                                                                                               | RT Primer Mix                                                    | 1.0 $\mu$ L                 |
|                                                                                                                                                                                                                                                                                                                                                                                                               | 5 x PrimeScript Buffer                                           | 4.0 $\mu$ L                 |
|                                                                                                                                                                                                                                                                                                                                                                                                               | RNase Free dH <sub>2</sub> O                                     | 4.0 $\mu$ L                 |
| Protocol                                                                                                                                                                                                                                                                                                                                                                                                      | 37°C for 15 min $\rightarrow$ 85°C 5 sec $\rightarrow$ 4°C       |                             |
| <b>LATE-PCR</b>                                                                                                                                                                                                                                                                                                                                                                                               |                                                                  |                             |
| Reaction components & concentrations                                                                                                                                                                                                                                                                                                                                                                          | Components                                                       | Concentrations (20 $\mu$ L) |
|                                                                                                                                                                                                                                                                                                                                                                                                               | 2 $\times$ Hotstart PCR Master Mix                               | 10 $\mu$ L                  |
|                                                                                                                                                                                                                                                                                                                                                                                                               | Excess primer                                                    | 1000 nM                     |
|                                                                                                                                                                                                                                                                                                                                                                                                               | Limiting primer                                                  | 25 nM                       |
|                                                                                                                                                                                                                                                                                                                                                                                                               | cDNA                                                             | As required                 |
|                                                                                                                                                                                                                                                                                                                                                                                                               | PCR-grade water                                                  | Up to 20 $\mu$ L            |
|                                                                                                                                                                                                                                                                                                                                                                                                               | TaqMan probes                                                    | As required                 |
| PCR protocols                                                                                                                                                                                                                                                                                                                                                                                                 | 95°C 5 min $\rightarrow$                                         |                             |



|                             |                                                                                                                                             |         |
|-----------------------------|---------------------------------------------------------------------------------------------------------------------------------------------|---------|
|                             | 10 cycles of 95°C 10 sec, 55°C 10 sec and 72°C 20 sec<br>→40 cycles of 95°C 10 sec, 50°C 10 sec and 72°C 20 sec →<br>72°C 10 min → 4°C hold |         |
| <b>Automation detection</b> |                                                                                                                                             |         |
|                             | Operation                                                                                                                                   | Time    |
| Step 1                      | RNA extraction                                                                                                                              | 30 min  |
| Step 2                      | RT                                                                                                                                          | 30 min  |
| Step 3                      | LATE-PCR                                                                                                                                    | 60 min  |
| Step 4                      | DNA computation                                                                                                                             | 120 min |
| <b>Probe preparation</b>    |                                                                                                                                             |         |
| Probe name                  | Concentration                                                                                                                               |         |
| A Probe S-1-top             | 24 μM                                                                                                                                       |         |
| A Probe S-1-bottom          | 20 μM                                                                                                                                       |         |
| A Probe S-2-top             | 24 μM                                                                                                                                       |         |
| A Probe S-2-bottom          | 20 μM                                                                                                                                       |         |
| A Probe S-3-top             | 24 μM                                                                                                                                       |         |
| A Probe S-3-bottom          | 20 μM                                                                                                                                       |         |
| A Probe S-4-top             | 24 μM                                                                                                                                       |         |
| A Probe S-4-bottom          | 20 μM                                                                                                                                       |         |
| A Probe L-1-top             | 24 μM                                                                                                                                       |         |
| A Probe L-1-bottom          | 20 μM                                                                                                                                       |         |
| A Probe L-2-top             | 24 μM                                                                                                                                       |         |
| A Probe L-2-bottom          | 20 μM                                                                                                                                       |         |
| A Probe L-3-top             | 24 μM                                                                                                                                       |         |
| A Probe L-3-bottom          | 20 μM                                                                                                                                       |         |
| A Probe L-4-top             | 24 μM                                                                                                                                       |         |
| A Probe L-4-bottom          | 20 μM                                                                                                                                       |         |
| A Probe T-1-top             | 24 μM                                                                                                                                       |         |
| A Probe T-1-bottom          | 20 μM                                                                                                                                       |         |
| A Probe I-1-top             | 24 μM                                                                                                                                       |         |
| A Probe I-1-bottom          | 20 μM                                                                                                                                       |         |
| A Probe V-1-top             | 24 μM                                                                                                                                       |         |
| A Probe V-1-bottom          | 20 μM                                                                                                                                       |         |
| A Probe V-2-top             | 24 μM                                                                                                                                       |         |
| A Probe V-2-bottom          | 20 μM                                                                                                                                       |         |
| A Probe V-3-top             | 24 μM                                                                                                                                       |         |
| A Probe V-3-bottom          | 20 μM                                                                                                                                       |         |
| A Probe V-4-top             | 24 μM                                                                                                                                       |         |
| A Probe V-4-bottom          | 20 μM                                                                                                                                       |         |
| A Probe V-5-top             | 24 μM                                                                                                                                       |         |
| A Probe V-5-bottom          | 20 μM                                                                                                                                       |         |
| A Probe C-1-top             | 24 μM                                                                                                                                       |         |
| A Probe C-1-bottom          | 20 μM                                                                                                                                       |         |
| A Probe C-2-top             | 24 μM                                                                                                                                       |         |
| A Probe C-2-bottom          | 20 μM                                                                                                                                       |         |
| A Probe C-3-top             | 24 μM                                                                                                                                       |         |
| A Probe C-3-bottom          | 20 μM                                                                                                                                       |         |

|                                        |               |                                                                                 |
|----------------------------------------|---------------|---------------------------------------------------------------------------------|
| A Probe C-4-top                        | 24 $\mu$ M    |                                                                                 |
| A Probe C-4-bottom                     | 20 $\mu$ M    |                                                                                 |
| A Probe A-1-top                        | 24 $\mu$ M    |                                                                                 |
| A Probe A-1-bottom                     | 20 $\mu$ M    |                                                                                 |
| B probe E top                          | 24 $\mu$ M    |                                                                                 |
| B probe E bottom                       | 20 $\mu$ M    |                                                                                 |
| B probe F top                          | 24 $\mu$ M    |                                                                                 |
| B probe F bottom                       | 20 $\mu$ M    |                                                                                 |
| N probe top                            | 24 $\mu$ M    |                                                                                 |
| N probe bottom                         | 20 $\mu$ M    |                                                                                 |
| Restoration probe E top                | 24 $\mu$ M    |                                                                                 |
| Restoration probe E bottom             | 20 $\mu$ M    |                                                                                 |
| Restoration probe F top                | 24 $\mu$ M    |                                                                                 |
| Restoration probe F bottom             | 20 $\mu$ M    |                                                                                 |
| Reporter top                           | 24 $\mu$ M    |                                                                                 |
| Reporter bottom                        | 20 $\mu$ M    |                                                                                 |
| <b>Fluorescence kinetic experiment</b> |               |                                                                                 |
| Probe name                             | Concentration | Reaction condition                                                              |
| A Probe S-1                            | 25 nM         | Buffer: 1 $\times$ TE buffer with 12.5 mM Mg <sup>2+</sup><br>Temperature: 37°C |
| A Probe S-2                            | 25 nM         |                                                                                 |
| A Probe S-3                            | 25 nM         |                                                                                 |
| A Probe S-4                            | 25 nM         |                                                                                 |
| A Probe L-1                            | 25 nM         |                                                                                 |
| A Probe L-2                            | 25 nM         |                                                                                 |
| A Probe L-3                            | 25 nM         |                                                                                 |
| A Probe L-4                            | 25 nM         |                                                                                 |
| A Probe T-1                            | 25 nM         |                                                                                 |
| A Probe I-1                            | 25 nM         |                                                                                 |
| A Probe V-1                            | 25 nM         |                                                                                 |
| A Probe V-2                            | 25 nM         |                                                                                 |
| A Probe V-3                            | 25 nM         |                                                                                 |
| A Probe V-4                            | 25 nM         |                                                                                 |
| A Probe V-5                            | 25 nM         |                                                                                 |
| A Probe C-1                            | 25 nM         |                                                                                 |
| A Probe C-2                            | 25 nM         |                                                                                 |
| A Probe C-3                            | 25 nM         |                                                                                 |
| A Probe C-4                            | 25 nM         |                                                                                 |
| A Probe A-1                            | 25 nM         |                                                                                 |
| B probe 1                              | 100 nM        |                                                                                 |
| B probe 2                              | 100 nM        |                                                                                 |
| N probe                                | 200 nM        |                                                                                 |
| Restoration probe E                    | 100 nM        |                                                                                 |
| Restoration probe F                    | 100 nM        |                                                                                 |
| Fuel E                                 | 200 nM        |                                                                                 |

|              |        |  |
|--------------|--------|--|
| Fuel F       | 200 nM |  |
| FAM reporter | 200 nM |  |
| ROX reporter | 200 nM |  |

**Table S6.** All DNA sequences

| <b>Name Sequence</b> | <b>Sequence (5'→3')</b>                                       | <b>Label</b> |
|----------------------|---------------------------------------------------------------|--------------|
| Primer-SIGLEC1-F     | TGCCTCTACCTCCACCTACTT                                         | /            |
| Primer-SIGLEC1-R     | GCCCATGCTCTGCTTACAAA                                          | /            |
| Primer-LY6E-F        | ATCTGTACTGCCTGAAGCC                                           | /            |
| Primer-LY6E-R        | GGAAGCCACACCAACATTGAC                                         | /            |
| Primer-TRDV3-F       | TGCTCTGCACTTACGACACT                                          | /            |
| Primer-TRDV3-R       | GCACCTTCTGATCTGCTGTT                                          | /            |
| Primer-IFIT1-F       | ATGGGCCTTGCTGAAGTGTG                                          | /            |
| Primer-IFIT1-R       | TCAGGGTTTTTCAGGGTCCAC                                         | /            |
| Primer-VNN1-F        | AAGCCATGCGATACCAGTGA                                          | /            |
| Primer-VNN1-R        | TGCCAAAACCTTCCAAAGGTGG                                        | /            |
| Primer-CD177-F       | CCACACCAGACAAATCGG                                            | /            |
| Primer-CD177-R       | GCAGGAAGGGCAAACCACTC                                          | /            |
| Primer-ARG1-F        | TGGACAGACTAGGAATTGGCA                                         | /            |
| Primer-ARG1-R        | CCAGTCCGTCAACATCAAACCT                                        | /            |
| A Probe S-1-top      | TAGAGGTGGGGCCTGCTACA                                          | /            |
| A Probe S-1-bottom   | GCCTCCTTCTCCAGGTGTAGCAGGCCCC<br>CACCTCTACCTCACTCACCTCATCACTA  | /            |
| A Probe S-2-top      | TAGAGGTGGTGGGCCTCCTGC                                         | /            |
| A Probe S-2-bottom   | GGCCCAACAGCAGGAGCAGGAGGCCCA<br>CCACCTCTACCTCACTCACCTCATCACTA  | /            |
| A Probe S-3-top      | TAGAGGTCCAGCAGCTGCTCT                                         | /            |
| A Probe S-3-bottom   | GCAGTCCCAGGACCCAGAGCAGCTGCT<br>GGACCTCTACCTCACTCACCTCATCACTA  | /            |
| A Probe S-4-top      | TAGAGGGGGTCAGAGCCCTGC                                         | /            |
| A Probe S-4-bottom   | ACTGATGCAGGCGGTGCAGGGCTCTGAC<br>CCCCTCTACCTCACTCACCTCATCACTA  | /            |
| A Probe L-1-top      | TAGAGGCATCTGCTCCGACCA                                         | /            |
| A Probe L-1-bottom   | ACGCAGTAGTTGTCCTGGTCGGAGCAGA<br>TGCTCTACCTCACTCACCTCATCACTA   | /            |
| A Probe L-2-top      | TAGAGGGACTGTGTCTGCTAG                                         | /            |
| A Probe L-2-bottom   | TTCCCAATGCCGGCACTAGCAGACACAG<br>TCCCTCTACCTCACTCACCTCATCACTA  | /            |
| A Probe L-3-top      | TAGAGGTCTCGTGACATTTGG                                         | /            |
| A Probe L-3-bottom   | TTGCTCAGGCTGTGGCCAAATGTCACGA<br>GACCTCTACCTCACTCACCTCATCACTA  | /            |
| A Probe L-4-top      | TAGAGGGACCTGTTCCCCGGC                                         | /            |
| A Probe L-4-bottom   | TCTGGGATGGGGCAGGCCGGGGAACAG<br>GTCCCTCTACCTCACTCACCTCATCACTA  | /            |
| A Probe T-1-top      | TAGAGGTCTGGTACCGGATAA                                         | /            |
| A Probe T-1-bottom   | AGGAATAATCTGGCCTTATCCGGTACCA<br>GACCTCTACCTCACTCACCTCATCACTA  | /            |
| A Probe I-1-top      | TAGAGGTTATGAACGGGCCAA                                         | /            |
| A Probe I-1-bottom   | TTTTCAAAGCAGGCCCTTGGCCCGTTCAT<br>AACCTCTACCTCACTCACCTCATCACTA | /            |
| A Probe V-1-top      | GATTGTGACTTTCAAGGGTGT                                         | /            |
| A Probe V-1-bottom   | ATCTATCCACCTCCACCTCTACACCCTTG<br>AAAGTCACAATCTCAGGCTCCTTGGGT  | /            |

|                            |                                                              |         |
|----------------------------|--------------------------------------------------------------|---------|
| A Probe V-2-top            | AAATCAATTCAATGTGGGTGT                                        | /       |
| A Probe V-2-bottom         | ATCTATCCACCTCCACCTCTACACCCACA<br>TTGAATTGATTTTCACCCATGAAAAGG | /       |
| A Probe V-3-top            | CTACCATAAGCAAAAGGGTGT                                        | /       |
| A Probe V-3-bottom         | ATCTATCCACCTCCACCTCTACACCCTTT<br>TGCTTATGGTAGCGTGCCACCAGTTTT | /       |
| A Probe V-4-top            | ATTTGATTCTCAAGGGGGTGT                                        | /       |
| A Probe V-4-bottom         | ATCTATCCACCTCCACCTCTACACCCCCT<br>TGAGAATCAAATACCACATCAGTGTTG | /       |
| A Probe V-5-top            | TGGCCGTTACCAATAGGGTGT                                        | /       |
| A Probe V-5-bottom         | ATCTATCCACCTCCACCTCTACACCCTAT<br>TGGTAACGGCCATCAGGGGGACTGA   | /       |
| A Probe C-1-top            | GAAGCGTGATGTGCAGGGTGT                                        | /       |
| A Probe C-1-bottom         | ATCTATCCACCTCCACCTCTACACCCTGC<br>ACATCACGCTTCTCACGCGCAGAGAAG | /       |
| A Probe C-2-top            | GATGAGGGAGGTGGGGGTGT                                         | /       |
| A Probe C-2-bottom         | ATCTATCCACCTCCACCTCTACACCCCCA<br>CCTCCCTCATGCTGAGAGGCAGGAGGC | /       |
| A Probe C-3-top            | GTCTCTCACTTGGGGGGGTGT                                        | /       |
| A Probe C-3-bottom         | ATCTATCCACCTCCACCTCTACACCCCCC<br>CAAGTGAGAGACTCCAGGCCCTCAGCC | /       |
| A Probe C-4-top            | GGCCCCAGCGCTGTGGGGTGT                                        | /       |
| A Probe C-4-bottom         | ATCTATCCACCTCCACCTCTACACCCCAC<br>AGCGCTGGGGCCAGTGCCAGCCCCACC | /       |
| A Probe A-1-top            | CTAGGAAGAAAGAAAGGGTGT                                        | /       |
| A Probe A-1-bottom         | ATCTATCCACCTCCACCTCTACACCCTTT<br>CTTTCTTCTAGTAGATAGCTGAGTGT  | /       |
| B probe E top              | GGGTGTAGAGGTGGAGGTGGATAGAT                                   | /       |
| B probe E bottom           | ACAACCACTTACTTCTTCATCTATCCACC<br>TCCACCTCT                   | /       |
| B probe F top              | TAGTGATGAGGTGAGTGAGGTAGAGG                                   | /       |
| B probe F bottom           | CCTCACTCACCTCATCACTACTATCATCA<br>CACATCTAT                   | /       |
| N probe top                | CTATCATCACACATCTATAACAACCACTTA<br>CTTCTTC                    | /       |
| N probe bottom             | GGATAGATGAAGAAGTAAGTGGTTGTAT<br>AGATGTGTGATGATAGTAGTGATG     | /       |
| Restoration probe E top    | ATAGATGAAGAAGTAAGTGGTTGTTGAG<br>AT                           | /       |
| Restoration probe E bottom | CATCCAATCACATACATCTCAACAACCA<br>CTTACTTCTTC                  | /       |
| Restoration probe F top    | TACATAATAGATGTGTGATGATAGTAGTG<br>A                           | /       |
| Restoration probe F bottom | CTATCATCACACATCTATTATGTACATAAC<br>ACAATCACA                  | /       |
| Fuel E                     | TCTCAACAACCACTTACTTCTTC                                      | /       |
| Fuel F                     | CTATCATCACACATCTATTATGT                                      | /       |
| Final FAM reporter top     | CATCCAATCACATAC                                              | 5'-BHQ1 |

|                           |                            |         |
|---------------------------|----------------------------|---------|
| Final FAM reporter bottom | TGAGATGTATGTGATTGGATG      | 3'-FAM  |
| Final ROX reporter top    | CATAACACAATCACA            | 3'-BHQ2 |
| Final ROX reporter bottom | TGTGATTGTGTTATGTACATA      | 5'-ROX  |
| B Reporter FAM (a)        | GGATAGATGAAGAAGTAAGTGGTTGT | 3'-FAM  |
| B Reporter FAM (b)        | ACAACCACTTACTTCTTC         | 5'-BHQ1 |
| B Reporter ROX (a)        | ATAGATGTGTGATGATAGTAGTGATG | 5'-ROX  |
| B Reporter ROX (b)        | CTATCATCACACATCTAT         | 3'-BHQ2 |
| A Reporter FAM (a)        | GGGTGTAGAGGTGGAGGTGG       | 3'-FAM  |
| A Reporter FAM (b)        | CCACCTCCACCTCT             | 5'-BHQ1 |
| A Reporter ROX (a)        | TGAGGTGAGTGAGGTAGAGG       | 5'-ROX  |
| A Reporter ROX (b)        | CCTCACTCACCTCA             | 3'-BHQ2 |
